# Supplementary material
Source: Springer Nature journal article supplement (https://www.springermedizin.de/resource/supplementary/12871_2011_124_MOESM1_ESM.pdf/9428944)

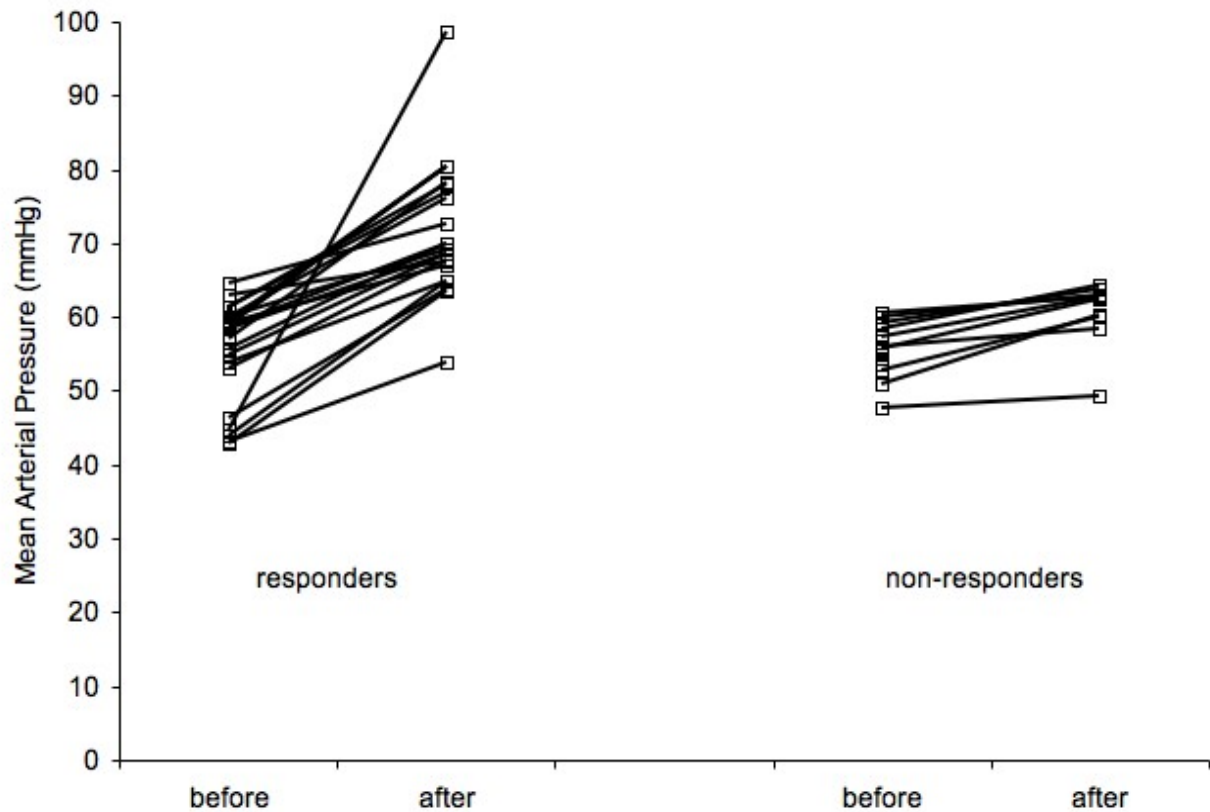

Supplement: MOESM1 [file 9428944]
